# 1 Adverse sequelae of the COVID-19 pandemic on mental health care

## 2 in seven low- and middle-income countries: MASC study

3

4

### 5 Authors

6 Charlotte Hanlon, Heidi Lempp, Atalay Alem, Azeb Asaminew Alemu, Rubén Alvarado, Olatunde

7 Ayinde, Adekunle Adesola, Elaine Brohan, Thandi Davies, Wubalem Fekadu, Oye Gureje, Lucy

8 Jalagania, Nino Makhashvili, Awoke Mihretu, Eleni Misganaw, Maria Milenova, Tamar Mujirishvili,

9 Olha Myshakivska, Irina Pinchuk, Camila Solis-Araya, Katherine Sorsdahl, Gonzalo Soto-Brandt,

10 Ezra Susser, Olga Toro-Devia, Nicole Votruba, Anuprabha Wickramasinghe, Shehan Williams,

11 Graham Thornicroft

12

### 13 Author affiliations

14 • Charlotte Hanlon, Centre for Global Mental Health, Health Service and Population

15 Research Department, Institute of Psychiatry, Psychology and Neuroscience, King's

16 College London, London, UK. Email: [charlotte.hanlon@kcl.ac.uk](mailto:charlotte.hanlon@kcl.ac.uk)

17 • Heidi Lempp, Centre for Rheumatic Diseases, Department of Inflammation Biology,

18 School of Immunology and Microbial Sciences, Faculty of Life Sciences & Medicine, King's

19 College London, UK. Email: [heidi.lempp@kcl.ac.uk](mailto:heidi.lempp@kcl.ac.uk)

20 • Atalay Alem, Department of Psychiatry and WHO Collaborating Centre for Mental Health

21 Research and Capacity Building, School of Medicine, College of Health Sciences, Addis

22 Ababa University, Addis Ababa, Ethiopia. Email: [atalay.alem@aau.edu.et](mailto:atalay.alem@aau.edu.et)

23 • Azeb Asaminew Alemu, Department of Psychiatry and WHO Collaborating Centre for

24 Mental Health Research and Capacity Building, School of Medicine, College of Health

25 Sciences, Addis Ababa University, Addis Ababa, Ethiopia. Email: [azaskora@gmail.com](mailto:azaskora@gmail.com)

NOTE: This preprint reports new research that has not been certified by peer review and should not be used to guide clinical practice.

- 26 • Rubén Alvarado Department of Public Health, School of Medicine, Faculty of Medicine,  
27 Universidad de Valparaíso, Chile. [ruben.alvarado@uv.cl](mailto:ruben.alvarado@uv.cl) ORCID: 0000-0002-8091-0324
- 28 • Olatunde Ayinde, Department of Psychiatry, University of Ibadan, Ibadan, Nigeria. Email:  
29 [oayinde@brandeis.edu](mailto:oayinde@brandeis.edu)
- 30 • Adekunle Adesola, Northamptonshire Healthcare NHS Foundation Trust, Northampton,  
31 United Kingdom. Email: [aoadesola@yahoo.com](mailto:aoadesola@yahoo.com)
- 32 • Elaine Brohan, Centre for Global Mental Health, Health Service and Population Research  
33 Department, Institute of Psychiatry, Psychology and Neuroscience, King's College  
34 London, London, UK. Email: [elaine.brohan@kcl.ac.uk](mailto:elaine.brohan@kcl.ac.uk)
- 35 • Thandi Davies, Alan J. Flisher Centre for Public Mental Health, Department of Psychiatry &  
36 Mental Health, University of Cape Town, 46 Sawkins Rd, Rondebosch, 7700, Cape Town,  
37 South Africa. Email: [thandi.davies@gmail.com](mailto:thandi.davies@gmail.com)
- 38 • Wubalem Fekadu, Department of Psychiatry, School of Medicine, College of Health  
39 Sciences, Addis Ababa University, Addis Ababa, Ethiopia. Email: [wubfek@gmail.com](mailto:wubfek@gmail.com)
- 40 • Oye Gureje, WHO Collaborating Centre for Research and Training in Mental Health,  
41 Neuroscience, Drug and Alcohol Abuse, Department of Psychiatry, University of Ibadan,  
42 Nigeria. Email: [oye\\_gureje@yahoo.com](mailto:oye_gureje@yahoo.com)
- 43 • Lucy Jalagania, Faculty of Business, Technology, and Education; School of  
44 Natural Sciences and Medicine, Ilia State University, Cholokashvili Av. 3/5. Tbilisi, Georgia.  
45 [lusi.jalaghanian1@iliauni.edu.ge](mailto:lusi.jalaghanian1@iliauni.edu.ge)
- 46 • Nino Makhashvili, Faculty of Business, Technology, and Education, School of  
47 Natural Sciences and Medicine, Ilia State University, Tbilisi, Georgia.  
48 [nino.makhashvili1@iliauni.edu.ge](mailto:nino.makhashvili1@iliauni.edu.ge)
- 49 • Awoke Mihretu, Department of Psychiatry and WHO Collaborating Centre for Mental  
50 Health Research and Capacity Building, School of Medicine, College of Health Sciences,  
51 Addis Ababa University, Addis Ababa, Ethiopia. Email: [awoke.hm@gmail.com](mailto:awoke.hm@gmail.com)

- 52 • Eleni Misganaw, Mental Health Service User Association, Addis Ababa, Ethiopia. Email:  
53 [eleni4mentalhealth@gmail.com](mailto:eleni4mentalhealth@gmail.com)
- 54 • Maria Milenova, Centre for Global Mental Health and Centre for Implementation Science,  
55 Institute of Psychiatry, Psychology and Neuroscience (IoPPN), King's College London, De  
56 Crespigny Park, London, SE5 8AF. Email: [maria.milenova@kcl.ac.uk](mailto:maria.milenova@kcl.ac.uk)
- 57 • Tamara Mujirishvili, Faculty of Health Sciences, University of Alicante, 03690 San Vicente  
58 del Raspeig, Alicante, Spain. Email: [tamar@ua.es](mailto:tamar@ua.es). ORCID: 0000-0001-6255-2095.
- 59 • Olha Myshakivska, Institute of Psychiatry of Taras Shevchenko National University of  
60 Kyiv, Kyiv, Ukraine. Email: [olha.myshakivska@knu.ua](mailto:olha.myshakivska@knu.ua) ORCID [https://orcid.org/0000-0001-](https://orcid.org/0000-0001-6699-3832)  
61 [6699-3832](https://orcid.org/0000-0001-6699-3832)
- 62 • Irina Pinchuk, Institute of Psychiatry of Taras Shevchenko National University of Kyiv,  
63 Kyiv, Ukraine. Email: [irina.pinchuk@knu.ua](mailto:irina.pinchuk@knu.ua). ORCID <https://orcid.org/0000-0002-0091-2136>
- 64 • Camila Solis-Araya, School of Public Health. Faculty of Medicine. University of Chile.  
65 Santiago, Chile. Email: [camila.solis.araya@uchile.cl](mailto:camila.solis.araya@uchile.cl)
- 66 • Katherine Sorsdahl, Alan J. Flisher Centre for Public Mental Health, Department of  
67 Psychiatry & Mental Health, University of Cape Town, 46 Sawkins Rd, Rondebosch, 7700,  
68 Cape Town, South Africa. Email: [Katherine.sorsdahl@uct.ac.za](mailto:Katherine.sorsdahl@uct.ac.za)
- 69 • Gonzalo Soto-Brandt, School of Public Health. Faculty of Medicine. University of Chile.  
70 Santiago, Chile. Email: [bsoto@uchile.cl](mailto:bsoto@uchile.cl)
- 71 • Ezra Susser, Columbia University and New York State Psychiatric Institute, NY 10032, New  
72 York, USA. Email: [ess8@cumc.columbia.edu](mailto:ess8@cumc.columbia.edu)
- 73 • Olga Toro-Devia. School of Public Health. Faculty of Medicine. University of Chile.  
74 Santiago, Chile. Email: [olga.toro@uchile.cl](mailto:olga.toro@uchile.cl)
- 75 • Nicole Votruba. Nuffield Department of Women's & Reproductive Health (NDWRH),  
76 University of Oxford, Women's Centre (Level 3), John Radcliffe Hospital OX3 9DU Oxford  
77 & Centre for Global Mental Health and Centre for Implementation Science, Institute of

78 Psychiatry, Psychology and Neuroscience (IoPPN), King's College London, De Crespigny  
79 Park, London, SE5 8AF. [Nicole.votruba@wrh.ox.ac.uk](mailto:Nicole.votruba@wrh.ox.ac.uk)

80 • Anuprabha Wickramasinghe, Department of Psychiatry, Faculty of Medicine, University of  
81 Colombo, Sri Lanka; and Department of Psychiatry, Faculty of Medicine and Allied  
82 Sciences, Rajarata University of Sri Lanka. Email: [anuprabha@psych.cmb.ac.lk](mailto:anuprabha@psych.cmb.ac.lk)

83 • Shehan Williams, Department of Psychiatry, Faculty of Medicine, University of Kelaniya,  
84 Sri Lanka. Email: [shehan@kln.ac.lk](mailto:shehan@kln.ac.lk)

85 • Graham Thornicroft, Centre for Global Mental Health and Centre for Implementation  
86 Science, Institute of Psychiatry, Psychology and Neuroscience (IoPPN), King's College  
87 London, De Crespigny Park, London, SE5 8AF. Email: [graham.thornicroft@kcl.ac.uk](mailto:graham.thornicroft@kcl.ac.uk)

88

89 **Corresponding author**

90 Professor Charlotte Hanlon, Centre for Global Mental Health, Health Service and Population  
91 Research Department, Institute of Psychiatry, Psychology and Neuroscience, King's College  
92 London, London, UK  
93 Email: [charlotte.hanlon@kcl.ac.uk](mailto:charlotte.hanlon@kcl.ac.uk)

94

95 **Short title:** COVID-19 and mental health services in 7 LMICs

96

97

98 **Abstract**

99 A WHO rapid assessment of early impact of the COVID-19 pandemic on mental health services  
100 worldwide found a consistent pattern of degradation. In this context the MASC study aimed to:  
101 (1) identify the consequences of the pandemic for mental health services and people with pre-  
102 existing mental health conditions (MHCs) in 7 low- and middle-income countries; and (2) identify  
103 good practice to mitigate these impacts. The study was conducted in Chile, Ethiopia, Georgia,  
104 Nigeria, South Africa, Sri Lanka and Ukraine. This was an observational study, using a mixed-  
105 methods convergent design, triangulating data from: (1) 144 key informants participating in semi-  
106 structured interviews or focus groups and/or a self-completed survey; (2) routine service  
107 utilization data; (3) local grey literature; and (4) expert consultation. We found clear evidence in  
108 all sites that the pandemic exacerbated pre-existing disadvantages experienced by people with  
109 MHCs and led to a deterioration in the availability and quality of care, especially for psychosocial  
110 care. Alongside increased vulnerability to COVID-19, people with MHCs faced additional barriers  
111 to accessing prevention and treatment interventions compared to the general population. To  
112 varying extents, sites showed accelerated implementation of digital technologies, but with  
113 evidence of worsening inequities in access. Where primary care-based mental health care was  
114 more developed or prioritised, systems seemed more resilient and adaptive. Our findings have  
115 the following implications. First, mental health service reductions are clear examples of  
116 ‘structural stigma’, namely policy level decisions in healthcare which place a low priority upon  
117 services for people with MHCs. Second, integration of mental health care into all general health  
118 care settings is key to ensuring accessibility and parity of physical and mental health care. Third,  
119 digital innovations should be designed to strengthen and not fragment systems. We discuss  
120 these findings in terms of anticipating such challenges in future and preparing layers of resilience.

121

122 **Key words**

123 Coronavirus; COVID-19; mental health care; mental health services; mental health systems; mixed  
124 methods; stigma  
125

## 126 Introduction

127 Prior to the global COVID-19 pandemic, mental health care was delivered to a small minority of  
128 people in the world with mental health conditions (MHCs) [1]. For people with severe depression,  
129 for example, only 22%, 11% and 4% of those in high-, middle- and low-income countries respectively,  
130 received minimally effective treatment [2]. During the early phases of the COVID-19 pandemic  
131 data suggested that in many countries the incidence of some types of MHCs, especially anxiety  
132 and depression, increased at the population level [3, 4]. At the same time, mortality rates from  
133 COVID-19 infection were found to be higher among people with MHCs than among the general  
134 population [5]. During this initial period, evidence emerged that the COVID-19 crisis response in  
135 many countries had the effect of weakening mental health services and systems [6]. It became  
136 clear that the mental health targets set by the United Nations Sustainable Development Goals  
137 aim to ‘Leave No-one Behind’ were at risk from a degradation of mental health care [7].

138

139 The *Mental health care: Adverse Sequelae of COVID-19 (MASC)* project was framed by the concept  
140 of the ‘mental health treatment gap’. This refers to the proportion of people in any community  
141 who need evidence-based mental health treatment who receive it [8]. In low- and middle-income  
142 countries (LMICs) over 80% of people with severe MHCs receive no mental health services [9].  
143 This contributes to persistence of symptoms, health deterioration, ostracism [10], long-term  
144 disability, exclusion from the workforce, social isolation, poorer physical health and premature  
145 mortality [11, 12]. In LMICs, mental health conditions account for 7.4% of the global burden of  
146 disease [13], but only 0.5% of these countries’ health budgets are spent on mental health care.  
147 Community mental health care is scarce, specialists are in short supply, and services are mostly  
148 hospital-based [14].

149

150 Numerous studies have examined COVID-19 in relation to the psychological wellbeing of the  
151 general population, or of the health workforce, with relatively less focus on people with pre-

152 existing MHCs and mental health services [15]. Evidence from mostly high-income countries  
153 indicates that a combination of factors related to the pandemic itself, and to the prevention and  
154 mitigation strategies, were responsible for infringement of the right to mental health of people  
155 with MHCs, with increased inequities in comparison with the general population [16]. Evidence of  
156 negative impacts of lockdown on people with existing MHCs and the adequacy of mental health  
157 services were reported from Switzerland [17], Italy [18] and Norway [17]. Reductions in the  
158 availability and quality of mental health services were reported from Spain [19] and significant  
159 unmet needs of service users, including inability to access welfare benefits were reported in the  
160 USA [20]. General adverse impacts of the pandemic were also reported: in Sweden 20% of people  
161 with pre-existing MHCs reported an increase in their psychiatric medication compared to pre-  
162 pandemic [21]. In a multi-centre study from Austria, Denmark and Germany, people with bipolar  
163 disorder reported an increase in negative lifestyles, including greater use of alcohol and smoking,  
164 and an increase in boredom, depression, somatization, anxiety, distress due to social distancing,  
165 and poorer sleep quality [22]. Impacts of COVID-19 on the physical health of people with severe  
166 MHCs were clear; including higher rates of COVID-19 infection, hospitalization and mortality for  
167 people with a pre-existing severe MHC [23, 24]. Nonetheless, lack of prioritisation or explicit  
168 exclusion of people with severe MHCs from COVID-19 vaccination programmes was observed in  
169 many settings [25, 26].

170

171 There have been notably fewer studies from settings in LMICs to examine impacts of COVID-19 on  
172 mental health services and people with MHCs; most have been conducted in a single setting in a  
173 single country. In Indonesia, the number of people with MHCs who were shackled increased from  
174 5,200 in 2019 to 6,200 in 2020 [27]. In China, the prevalence of post-traumatic stress disorder  
175 (PTSD) was high among people with MHCs [28]. In India, most people with MHCs (72.6%)  
176 reported a positive impact of the pandemic due to the increased availability of family support



177 [29]. However, some (22.6%) stopped medications, many had difficulties accessing health services  
178 and experienced increased interpersonal conflict, sleep difficulties and a surge in screen time.  
179 While the COVID-19 pandemic undoubtedly drove innovation in responding to population mental  
180 health needs globally [30], there have been no cross-country studies examining the pattern of  
181 responses and impacts of mental health service changes on people with severe MHCs (such as  
182 psychotic disorders and bipolar disorder) in LMICs.

183

184 In this context, the aims of the MASC study were to: (1) identify the consequences of the COVID-  
185 19 pandemic for mental health services and people with pre-existing MHCs in seven LMICs; and  
186 (2) identify examples of good practice in efforts to mitigate these impacts in the future. Country  
187 level findings from this dataset have been presented for Chile [31], Ethiopia [32] and South Africa  
188 [33]. In this paper we report a comparative analysis of the main cross-country findings of the  
189 MASC study, focusing on cross-country similarities and differences in impacts and responses to  
190 inform future preparedness and system resilience.

191

## 192 [Materials and methods](#)

193 The MASC project was conducted in seven LMICs in five continents (Chile, Ethiopia, Georgia,  
194 Nigeria, South Africa, Sri Lanka and Ukraine). This was an observational study with a mixed-  
195 methods convergent design. Details of the study sites and the data collection and methods  
196 employed are shown in Table 1.

197

198 **Table 1. Data gathering methods and samples across the 7 countries of the MASC study**

|                                                | <b>Chile</b>                                                                                                                                     | <b>Ethiopia</b>                                                                                                                      | <b>Georgia</b>                                                                                                                                                      | <b>Nigeria</b>                                                                                                                                 | <b>South Africa</b>                                                                                                                                         | <b>Sri Lanka</b>                                                                                                                                                          | <b>Ukraine</b>                                                                                                                     |
|------------------------------------------------|--------------------------------------------------------------------------------------------------------------------------------------------------|--------------------------------------------------------------------------------------------------------------------------------------|---------------------------------------------------------------------------------------------------------------------------------------------------------------------|------------------------------------------------------------------------------------------------------------------------------------------------|-------------------------------------------------------------------------------------------------------------------------------------------------------------|---------------------------------------------------------------------------------------------------------------------------------------------------------------------------|------------------------------------------------------------------------------------------------------------------------------------|
| Time of data collection                        | April 2021                                                                                                                                       | February-April 2021                                                                                                                  | December 2020-January 2021                                                                                                                                          | June 2021                                                                                                                                      | July-Sept 2021                                                                                                                                              | May – June 2021                                                                                                                                                           | June 2021                                                                                                                          |
| Researchers conducting the qualitative study   | 2 (OT, CS)<br>Both female;<br>1 mental health professional, 1 mental health researcher<br>Qualifications: PhD, MSc                               | 2 (AM, WF)<br>Both male;<br>1 clinical psychologist, 1 mental health professional;<br>Qualifications: MSc, MA                        | 2 (TM, LD)<br>Both female;<br>Both Mental Health professionals;<br>Qualifications: PhD Student; MA student                                                          | 2 (OA, AdA)<br>Both male;<br>Both mental health professionals;<br>Qualifications: psychiatrists                                                | 2 (TD, KS)<br>Both female:<br>Registered counsellor, health psychologist<br>Qualification: both PhD                                                         | 2 (AW, SW)<br>1 female, 1 male;<br>Both psychiatrists<br>Qualifications: MD, MSc                                                                                          | 1 (IP)<br>Female;<br>Psychiatrist;<br>Qualifications: MD, PhD                                                                      |
| Location of interviews/focus groups            | Online                                                                                                                                           | Clinical settings, home or office and online                                                                                         | Online and face -to-face interviews                                                                                                                                 | Online meeting and telephone interviews                                                                                                        | Online                                                                                                                                                      | Online meeting or clinical setting                                                                                                                                        | Online                                                                                                                             |
| Language (and translated into English)         | Spanish                                                                                                                                          | Amharic                                                                                                                              | Georgian                                                                                                                                                            | English                                                                                                                                        | English                                                                                                                                                     | English or Sinhala                                                                                                                                                        | Ukrainian                                                                                                                          |
| Recruitment sample type                        | Purposive                                                                                                                                        | Purposive and snowballing                                                                                                            | Purposive                                                                                                                                                           | Purposive                                                                                                                                      | Purposive                                                                                                                                                   | Purposive                                                                                                                                                                 | Purposive                                                                                                                          |
| Average duration of focus groups or interviews | 1-1.5 hours                                                                                                                                      | 40 minutes                                                                                                                           | 1-1.5 hours                                                                                                                                                         | 45 min – 1.5 hours                                                                                                                             | 40 minutes                                                                                                                                                  | 45-60 minutes                                                                                                                                                             | 1.5-2 hours                                                                                                                        |
| Number of participants and roles               | 28 participants (18 women, 10 men) in 3 focus group discussions: 11 health services professionals: 5 working at the primary health care level, 3 | 11 expert group<br><br>18 participants in qualitative interviews (3 women, 15 men): individuals with mental health conditions (n=4), | 10 Expert Group members* (9 women, 1 man), each also participated in qualitative interviews and 7 completed narrative tool: Inpatient service providers - 2 persons | 15 participants (6 women, 9 men) completed the key informant interview.<br><br>12 participants (5 females and 7 males) took part in the online | 10 expert group members<br>17 stakeholders (10 women, 7 men) (12 interviews; 9 narrative tool and quantitative survey): public sector servants, NGO service | 26 stakeholders participating in interviews and completing quantitative tool (18 men, 8 women): Health Service Professionals=14 (Medical officer mental health, community | 23 participants (8 women, 15 men) in 3 Focus Group Discussions. Hospital directors (5 Directors of regional psychiatric hospitals) |

|  |                                                                                                                                                                                                                                                             |                                                                                                                                                                                                                                      |                                                                                                                                                                                                                                                                                                                                                                                                                                                                                                                                                   |                                                                                                                                                                                                                                                                                                             |                                                                                                                                          |                                                                                                                                                                                                                                                                                                                                                                                                                                                                                                                                                    |                                                                                                                                                                                                                                                                                                                                               |
|--|-------------------------------------------------------------------------------------------------------------------------------------------------------------------------------------------------------------------------------------------------------------|--------------------------------------------------------------------------------------------------------------------------------------------------------------------------------------------------------------------------------------|---------------------------------------------------------------------------------------------------------------------------------------------------------------------------------------------------------------------------------------------------------------------------------------------------------------------------------------------------------------------------------------------------------------------------------------------------------------------------------------------------------------------------------------------------|-------------------------------------------------------------------------------------------------------------------------------------------------------------------------------------------------------------------------------------------------------------------------------------------------------------|------------------------------------------------------------------------------------------------------------------------------------------|----------------------------------------------------------------------------------------------------------------------------------------------------------------------------------------------------------------------------------------------------------------------------------------------------------------------------------------------------------------------------------------------------------------------------------------------------------------------------------------------------------------------------------------------------|-----------------------------------------------------------------------------------------------------------------------------------------------------------------------------------------------------------------------------------------------------------------------------------------------------------------------------------------------|
|  | <p>from community mental health centres, 3 from psychiatric services in general hospitals. 10 Policy makers: 2 from the ministry of health, 8 mental health care network directors. 7 experts by experience: independent users and family organizations</p> | <p>representatives from national bodies involved in the mental health response to COVID-19 (n=2), mental health experts (n=8), a religious leader (n=1), a human rights advocate (n=1), and civic society representatives (n=2).</p> | <p>Outpatient ambulatory service providers - 3 persons<br/>Community-based Service provider (Assertive Community Team) - 1 person<br/>Community-based MH Service (Mobile Team) - 3 persons<br/>Community-based Service (Crisis Intervention Centre) - 1 person<br/>Non-governmental (NGO) mental health service - 3 persons<br/>Psychosocial Centre - 1 person<br/>Service user (person with lived experience) from a local NGO - 1 person<br/>Human rights advocate, NGO representative - 1 person<br/>Addiction service provider - 1 person</p> | <p>expert panel meetings.<br/><br/>Psychiatrists working in different care settings, psychiatrists with administrator roles, medical officers at different levels of care, nurses, programme officers and managers in NGO settings, Social Workers, Psychologists, Service users and family care givers</p> | <p>providers, psychiatrists, psychologists, mental health nurses, counsellors and occupational therapists. (no service users/carers)</p> | <p>psychiatric nurses, Social Worker, health education nurse, Consultant Psychiatrists of different settings like forensic and general adult, pharmacist)<br/><br/>Policy makers, stakeholders and NGOs=7 (chairperson of Befrienders, members of civil society, director and deputy director of National Institute of mental health, Sri Lanka, other administrators, Chairman of the Board of studies - Psychiatry, Sri Lanka)<br/><br/>Expert by Experience and Advocates=5 (elders' home manager, substance counsellor, care giver, mental</p> | <p>Doctors (psychiatrists, family doctors, psychologists) – (10 medical workers: 3 at the primary care settings, 5 - from outpatient facilities, 2 - from general hospitals that provide psychiatric care).<br/><br/>Patients with mental health disorders from different regions of Ukraine (8 experts: independent users and patients).</p> |
|--|-------------------------------------------------------------------------------------------------------------------------------------------------------------------------------------------------------------------------------------------------------------|--------------------------------------------------------------------------------------------------------------------------------------------------------------------------------------------------------------------------------------|---------------------------------------------------------------------------------------------------------------------------------------------------------------------------------------------------------------------------------------------------------------------------------------------------------------------------------------------------------------------------------------------------------------------------------------------------------------------------------------------------------------------------------------------------|-------------------------------------------------------------------------------------------------------------------------------------------------------------------------------------------------------------------------------------------------------------------------------------------------------------|------------------------------------------------------------------------------------------------------------------------------------------|----------------------------------------------------------------------------------------------------------------------------------------------------------------------------------------------------------------------------------------------------------------------------------------------------------------------------------------------------------------------------------------------------------------------------------------------------------------------------------------------------------------------------------------------------|-----------------------------------------------------------------------------------------------------------------------------------------------------------------------------------------------------------------------------------------------------------------------------------------------------------------------------------------------|

|                                          |                                                           |                                      |                          |                                 |                       |                                                             |                                                                                                                                                                                                              |
|------------------------------------------|-----------------------------------------------------------|--------------------------------------|--------------------------|---------------------------------|-----------------------|-------------------------------------------------------------|--------------------------------------------------------------------------------------------------------------------------------------------------------------------------------------------------------------|
|                                          |                                                           |                                      |                          |                                 |                       | health advocacy group, consumer action forum founder)       |                                                                                                                                                                                                              |
| Software used                            | No                                                        | Opencode                             | No                       | MAXQDA                          | Opencode              | Opencode                                                    | No                                                                                                                                                                                                           |
| Number of researchers involved in coding | 2                                                         | 2                                    | 2                        | 2                               | 2                     | 4                                                           | 1                                                                                                                                                                                                            |
| Regions                                  | North, Centre, South Centre, South and Austral Macrozones | rural and urban settings in Ethiopia | Tbilisi, Batumi, Rustavi | 6 geopolitical zones of Nigeria | Western Cape Province | Sri Lanka (Western province, North central province, other) | 11 cities from different regions of Ukraine: Lviv, Slovyansk (Donetsk region), Kyiv, Lutsk, Mariupol (Donetsk region), Beregovo (Zakarpattia region), Khmelnytsky, Chernivtsi, Mykolaiv, Kharkiv, Chernihiv. |

199  
200 \*Number for roles held by stakeholders is more than 10 because some stakeholders hold multiple roles.

201

202 The quantitative component compared service utilisation data from public mental health facilities  
203 between 2019 and 2021 from the available health management and information system statistical  
204 registries of the local, regional or national health services in the available study sites and  
205 countries. Analyses of country level service utilisation data have been reported previously [31-33]  
206 but our analysis focused on patterns across settings and incorporated additional data from  
207 Georgia, Sri Lanka and Ukraine. Given the heterogeneity across sites in terms of the availability of  
208 in-patient/out-patient data and the service level within the health system, the findings were  
209 analysed descriptively, presented in graphical form and combined with key informant reports of  
210 the COVID-19 pandemic impacts on mental health services at all levels of the health system.

211

212 For the qualitative component, we conducted semi-structured focus groups and/or interviews  
213 with purposively selected key informants, including mental health services providers, planners,  
214 decision-makers, and service users and members of relevant organisations in each country.  
215 Potential respondents were approached by phone or email and interviews were conducted  
216 virtually or in-person depending on the setting. 144 people participated in the qualitative study,  
217 with 16 refusals in total across the sites. In Chile, a master's student was present in addition to  
218 the interviewer but in other sites just the interviewer was present. See Supplementary File 1 for  
219 the topic guide, which explored impacts of the pandemic on people with MHCs in the  
220 community; impacts on mental health care availability and quality at the primary, secondary and  
221 tertiary level; access to physical health care; policies, plans and organisational level impacts on  
222 people with MHCs and services. See Supplementary File 4 for the COREQ checklist for reporting  
223 qualitative studies. In each country, researchers who carried out data collection had experience  
224 and training in qualitative research. Researchers had pre-existing professional links to some  
225 respondents but not clinical relationships. They were known as researchers on mental health or  
226 mental health clinicians in their countries.

227 Interviews were conducted in local languages, transcribed and translated into English. Country  
228 level analyses were first conducted by country teams using template analysis [35]. This approach  
229 centres on the set up of a finalised coding template that includes the themes identified by the  
230 researchers as relevant in the qualitative data set and arrange these in a meaningful way [36].  
231 The analytical process begins with the definition of *a priori* themes, subthemes and codes; and as  
232 the analysis proceeds, these may be revised or disregarded if they do not relate to the empirical  
233 data. A cross-country analysis took place, with each site contributing key findings for the main  
234 themes/sub-themes and illustrative accounts.

235

236 We also used a quantitative rating tool (see Supplementary File 2) to seek structured input from  
237 additional key stakeholders. The tool included reasons for change in service utilisation and  
238 mitigation strategies. Alongside this blueprint, country teams identified relevant published or  
239 grey literature from each country, including policies, plans and programmatic reports. Where  
240 possible, a specially convened national expert group oversaw the study, guided identification of  
241 key informants and relevant grey literature, and reviewed the emerging findings. The results  
242 were integrated through triangulation [37] using a convergent coding matrix, to identify key  
243 results for each predefined theme. See Supplementary file 3 for the cross-country matrix. For  
244 ease of references the countries are coded as follows: CH: Chile; ET: Ethiopia; GE: Georgia; NI:  
245 Nigeria; SA: South Africa; SL: Sri Lanka; UKR: Ukraine).

246

## 247 [Ethical considerations](#)

248 Ethical approval was obtained from King's College London Research Ethics Committee (HR-20/21-  
249 21056) and from each participating country partner: Chile: Institutional Review Board of the  
250 Faculty of Medicine of the University of Chile (project No. 270-2020); Ethiopia: Institutional  
251 Review Board of the College of Health Sciences, Addis Ababa University (Ref 087/20/CDT);  
252 Georgia (Ethics Committee at Ilia State University; Ref. N 037-102020); Nigeria: University of

253 Ibadan/University College Hospital Ethics Committee (UI/EC/20/0366); South Africa: University of  
254 Cape Town Human Ethics Research Council (Ref: 552/2020); Sri Lanka: Rajarata University of Sri  
255 Lanka Ethics Review Committee (ERC/2021/06); Ukraine: Ethics committee of Taras Shevchenko  
256 National University of Kyiv's Institute of Psychiatry (No. 2/10/01/2022).

257

## 258 Results

259 Pervasive negative impacts of the COVID-19 pandemic on people with pre-existing MHCs were  
260 reported across the seven countries, affecting life in the community and closely linked to  
261 difficulties with access to adequate health, psychological and social care. Mental health-related  
262 stigma amplified adverse consequences of the pandemic.

263

### 264 Life in the community

265 Respondents across all countries reported how pandemic control measures and economic  
266 disruption had adversely affected people with MHCs and their families, exacerbating pre-existing  
267 disadvantage.

268

### 269 Stigma and human rights violations

270 Stigma towards people with MHCs increased in some (CH, ET, NI, SL) but not all countries. Pre-  
271 existing perceptions of the unreliability and dangerousness of people with MHCs combined with  
272 fear of contagion of COVID-19 to magnify social exclusion (CH, ET, SL). Conflating COVID-19  
273 infection with mental illness fuelled stigma [NI]:

274 *'... when the people see that the person has a relapse, they start to think the COVID has*  
275 *entered the person's brain... they call it madness, not mental disorder, which further*  
276 *worsen the stigma. The person has COVID which is an infectious disease... it's like having*  
277 *double burden which is a worse situation for somebody with a mental health condition'.*

278  
279  
280  
281  
282  
283  
284

*Psychiatrist, Nigeria*

Public and family-level stigma was exacerbated by the deterioration in mental health of some people with MHCs (ET, NI, SA). Worsened mental health led to families resorting to use of physical restraints for unmanageable behavioural disturbance (ET, NI). Although increased public discussion about mental health in some countries (ET, NI, SA) raised awareness and reduced stigma, this was largely in relation to depression and anxiety.



## Economic and social life

Aggravation of economic problems was reported to have differentially negatively affected people with MHCs (CH, ET, NI, SA, UKR), for example, being laid off first or at higher risk of unemployment because they were seen as less reliable workers (ET, NI).

*‘Some service users were laid [off] from their work due to COVID-19 and some of them still didn’t get a job because once they became out of the system, it has been difficult to be re-employed since the macroeconomy is weak to accommodate many people.’*

*Mental health service user, Ethiopia*

Access to public funds for economic support and food supply for people with MHCs were either difficult to access (CH), limited (NI, SA, SL) or non-existent (ET, GE). Reduced social support and increased isolation of people with MHCs were reported across all study countries. The reasons included suspension or disruption of in-patient, social care and community services (CH, ET, GE, NI, SA), extensive quarantines, enforced home-based isolation, and social distancing measures in all countries.

*‘People with mental illness already had difficulty communicating and integrating with society, and in this setting [the pandemic] their situation became even worse.’*

*NGO Representative, Georgia*

## Social care and residence

Increased vulnerability of people with severe MHCs to homelessness was reported in several countries (CH, ET, NI, SA) due to the worsening economic climate (NI), restricted movements (SA), community residential homes being unable to maintain services for the poorer community members (ET, SA), religious and traditional healing sites being unable to provide shelter (ET, NI, SL), families being overwhelmed because of the lack of access to care and other support (ET), and overcrowding at home (CH). However, in Chile, newly established hostels for homeless people which included support from mental health teams were reported. In Sri Lanka, care homes may have helped to mitigate the risk of homelessness. People with MHCs living in

social/care homes were particularly vulnerable to COVID-19 outbreaks and experienced social isolation due to family visiting bans (SA, SL, UKR).

## Health systems, governance, and legislation

### Legislation or policies affecting people with mental health conditions

While there were no reports of discriminatory policies or laws introduced because of the pandemic, there was evidence of a lack of policies designed to uphold the rights of people with MHCs within COVID-19 responses (ET, GE, SA). In some places, this absence rendered people with MHCs vulnerable to coercive practices (ET, NI) or exclusion from care (SA):

*‘Nobody had given any thought to what would happen in the psychiatric hospitals. We were just tasked to find a way... Unlike everywhere else in the health system where special provision had been made for people coming in and needing medical attention, nothing was done for people with mental illnesses.’*

*Psychiatrist, South Africa*

Sri Lanka had strong policy commitment to maintain mental health care, evident in written documentation (three special circulars issued through the health ministry) and in its implementation. In other countries (ET, NI), national level commitments were not replicated at sub-national levels or ignored the needs of local services (CH) or were not associated with concrete action to implement mental health recommendations as part of the pandemic response (ET, GE, NI, SA).

### Co-ordination of COVID-19 response in mental health services

Overall, there was a lack of preparedness for an adequate pandemic response in mental health services in all sites, particularly for remote delivery of care. In some countries, COVID-19 protocols for mental health services were delayed (ET), variably implemented (ET, NI), left to facilities and service providers to develop (GE, SA) or could not be implemented without additional resources

(ET). Responses were notably better in Sri Lanka and Ukraine where, for example, co-ordination was achieved through online conferences, seminars, and effective information sharing between managers and doctors in psychiatric institutions (UKR).

*‘Doctors and heads of psychiatric institutions... .. adhered to uniform preventive measures, sanitary norms, and requirements [were] developed for all medical institutions without differentiation in terms of specialization. All the necessary information on treatment, prevention, features of COVID-19 was provided regularly throughout the year through online conferences, seminars.’*

*Head of Psychiatric Institution, Ukraine*

Resourcing and programming of mental health care

Although mental health services were classified as essential services in most countries (CH, ET, SA, SL), in practice this did not materialise except for Sri Lanka. COVID-19 exposed and exacerbated the pre-existing poor resourcing of the mental health sector.

*‘I think that historically mental health has always been under-catered for. I think that right now, all the disciplines are taking a cut. And that cut is happening at best proportionately. But we have always been underserviced and now they are taking the same amount away from everyone which means that we are going to feel it even more than everyone else.’*

*Psychiatrist, South Africa*

When the pandemic arrived, some government mental health care budgets were diverted to pandemic response (ET, SA) or maintained but found to be inadequate in the face of increasing demand (CH), but other countries protected (SL) or even increased (GE: 5% increase in 2021) their budgets or benefited from external funding (NI, SL). In SL, World Bank funding supported services for mental health rehabilitation, people with developmental disabilities and

development of COVID-19 wards at the National Institute of Mental Health, for mental health nurse training, and a mental health helpline.

*‘The allocation of mental health resources to COVID-19 implies that people with mental health conditions were not getting the required services. There are other hospitals and treatment centres for different specializations such as orthopaedic, internal medicine or general health facilities, but their resources were not taken. ... Why mental health care?’*

*Psychiatrist, Ethiopia*

Plans to expand access to mental health care through training of primary health care workers were put on hold in some countries (ET) but accelerated in others (GE). Structures for supervising task-shared mental health care were disrupted (ET, NI, SA). Across countries, a paucity of routine data on mental health system functioning and population mental health need was reported and undermined both preparedness and response.

## Impacts and adaptations from mental health services

### Access and availability of mental health services

In five of the seven countries (ET, GE, NI, SA, UKR), there was limited pre-existing integration of mental health care within primary care, which constrained options for making mental health care locally available when the pandemic began. When present, mental health care in primary care was not always prioritised as an essential service (ET, SA). Sri Lanka was an exception, due to extensive pre-existing integration of mental health in PHC that was a legacy of a previous humanitarian crisis - the 2004 tsunami. Even so, periodic disruptions occurred due to infection waves and lockdowns. In Georgia, rapid expansion of capacity strengthening for delivery of mental health care in primary care was rolled out as a priority response. In South Africa, community health workers linked to primary care made efforts to deliver medication to the homes of people known to have a severe MHC.

Mental health care in general hospital settings was either very limited pre-pandemic (GE, ET) or became less available (CH, NI, SA), further increasing reliance on centralised specialist services. Efforts were made to increase the accessibility of mental health care through community outreach and through the development of mobile mental health teams (UKR).

*‘Outpatient care is now provided by mobile brigades... Patients are waiting for them. It can be said that the direction of work is changed: “doctor to patient” instead of the previous model of “patient to doctor”.’*

*Psychiatrist, Ukraine*

Mental health services and availability of specialists at all levels in the health system were disrupted by movement restrictions affecting staff (NI), lack of personal protective equipment (NI), redeployment of staff to COVID-19 clinical duties (CH, ET, SA, SL) and COVID-19 related illness or quarantine of staff (CH, SL).

*‘There was no reduction or redeployment of healthcare staff, but there was an increase in staff taking paid sick leave, and this has impacted the patients who were no longer receiving adequate services and care [due to staff shortages], for example, a psychologist who would have otherwise continued with psychotherapy, or any needed interventions.’*

*Health Service Professional, Chile*

Tertiary mental health services were not spared disruption. Reassignment of specialist mental health facilities and in-patient wards to COVID-19 activities occurred in some (ET, GE, NI, SA, UKR) countries. In Sri Lanka this was small-scale and only during the peak of the pandemic. Attendance for out-patient mental health care was discouraged (SA), triage systems were introduced to prioritise emergency presentations (NI, SA) and the intervals between appointments was lengthened (ET, NI, SA).

*'The Mobile Team service was suspended for some time because home visits were dangerous for both patient and their family and mobile teams as well.'*

*Community mobile team service provider, Georgia*

The number of in-patient beds for mental health care was reduced in some countries (ET, UKR, SA, SL), new admissions were suspended in others (CH, SA) or higher thresholds for admission were applied (CH, NI, SL, SA). In addition, admissions were suspended or reduced whenever there were outbreaks of COVID-19 on the wards (ET, GE, SL).

#### Utilisation of mental health services

There was markedly less use of public sector outpatient mental health services in five of the seven countries (CH, ET, NI, SL, SA), although increased attendance occurred at private sector care in some settings (NI) and increased demand for emergency admission in others (CH, SA). Compared with 2019 (pre-pandemic), in 2020 (first year of pandemic) there were clear reductions during all or part of 2020 for inpatient service use in ET, SA, SL and UKR (Fig 1).

#### **Fig 1: Mental health in-patient service utilisation in MASC countries in 2019 and 2020**

<sup>a</sup>Data from the national referral hospital in Addis Ababa, Ethiopia; <sup>b</sup>National data, Sri Lanka; <sup>c</sup>Data for the Western Cape, South Africa; <sup>d</sup>Data from Bila Tserkva and Irpin (Kyiv Region) and Peresazh (Chernigiv Region)

Regarding out-patient service utilisation there was a more mixed picture (Fig 2). There were persistent reductions throughout 2020 in out-patient use in some (CH, SA, SL, UKR) but not all (ET, GE) countries. In Ethiopia, maintained levels of out-patient contacts at the national referral hospital reflected the closure of other specialist out-patient clinics and, therefore, masked a de facto fall in per capita utilisation.

#### **Fig 2: Mental health out-patient service utilisation in MASC countries in 2019 and 2020**

<sup>i</sup>National data, Chile; <sup>ii</sup>Data from the national referral hospital in Addis Ababa, Ethiopia; <sup>iii</sup>Data from cities of Tbilisi, Batumi, Rustavi, Georgia; <sup>iv</sup>Data for the Western Cape, South Africa; <sup>v</sup>Data from Anuradhapura Teaching Hospital, Sri Lanka; <sup>vi</sup>Data from Bila Tserkva and Irpin (Kyiv Region) and Peresazh (Chernigiv Region).

Difficulty with transport to access centralised, specialist mental health care was problematic in all countries, exacerbated by movement restrictions. Attendance for mental health care was also reduced due to fear of infection (ET, NI, SA, GE, SL).

*‘... Access to care generally was reduced drastically for some of the reasons I have mentioned earlier that the lockdown affected free movement of people across ... and mental health services are not readily available within primary care, so many individuals needed to travel for sometimes 50 kilometres, 100 kilometres to be able to access mental healthcare services...’*

*Psychiatrist, Nigeria*

#### Quality and adequacy of mental health care

Mental health care at all levels in the health system became more narrowly biomedical in all countries and was difficult to maintain, with increased costs and interruptions to supply of essential psychotropic medication in some countries (ET, NI, SA) and periodic stockouts in others (CH, GE). Most countries sought to find ways to allow continuity of medication supply for people with MHCs, including through home delivery (CH, SA, SL), sending prescriptions to more locally accessible pharmacies (ET) and writing prescriptions of longer duration (ET, SA).

Participation of service users in ensuring quality of primary and community mental health care ceased in Chile. Community-based psychosocial interventions, counselling, group workshops and community activities barely existed pre-pandemic in Ethiopia and Nigeria. In other countries, these were substantially reduced (CH, SL, GE) or stopped altogether (SA). In Georgia and

Ukraine, pressure for mental health services in primary care increased, but health workers were ill-equipped to deliver mental health care, leading to concerns about quality of care. Supervision of primary care staff delivering mental health care was reduced in Chile, Nigeria and Sri Lanka.

*‘Mental health services are maintained; however, psychosocial interventions and community activities have been suspended. The pharmacological treatment was followed up, and any additional psychosocial support service users needed were abandoned.’*

*Health Service Professional, Chile*

In secondary and tertiary level mental health care, most countries saw increases in waiting times and significant reductions in consultation duration and frequency (all sites). Although new patients were assessed face-to-face in most cases, follow up appointments were replaced by issuing repeat prescriptions unless there was a clear clinical need for in-person review (ET, SL). The use of facemasks limited patient-doctor non-verbal communication and rapport (CH, ET, NI, SL, SA) and disease control measures reduced involvement of families in consultations (SL). This was later mitigated through use of transparent screens (SL, tertiary setting in ET).

In countries where psychological therapies in secondary and tertiary care were more widespread, there was a substantial reduction in availability (CH, ET, NI, SA, SL). This was due to lower prioritisation of this aspect of care (not considered essential) and the restrictions on face-to-face interactions (ET, NI, SL, SA). A further contributing factor was the redeployment of psychologists to support frontline health workers (CH, ET, GE). Availability of psychological interventions in Ethiopia, South Africa and Sri Lanka did not return to pre-pandemic levels even when disease control restrictions were eased. Group therapies, for example for people with substance use disorders, stopped entirely in some countries (ET, SA, SL). In four countries CH, GE, SA, UKR), efforts were made to transition psychological interventions to online platforms, but the inadequacy of this approach compared to face-to-face meetings was reported.



*‘We try to substitute our group sessions with individual work, but patients always ask: “When can we return to the group and start working again?” It is very important for them. In the group they feel that they are not alone with the problem, and we see that general progress from the group work is better.’*

*Psychologist, Ukraine*

*The Psychosocial Rehabilitation Centre for persons with severe mental illness closed at the end of March 2020, opened temporarily in September, but closed again in November due to the threat of the virus. This service was important for the patients, they visited it [the venue] for socialization and to communicate with each other, therapies were conducted, the environment was warm-hearted and comfortable.*

*Psychosocial service provider, Georgia*

In-patient services were often suspended, or minimised, and patients were discharged earlier than usual (CH, ET, NI, SA, SL), with concern that the discharge was premature (ET, SA), but in other settings in-patient stays were prolonged due to staff shortages (GE). In-patients were negatively affected due to the restriction of family visits (CH, UKR, SA, SL). Specialized mental health and psychosocial support services for people with intellectual disabilities were also hard-hit (UKR).

#### Transition to remote care

Many countries introduced remote care by phone or online in public sector services (CH, GE, SA, SL, UKR), but this was largely restricted to the private sector or non-governmental organisations in ET and NI. Phone-based activities included clinical assessments and follow-up appointments (CH, NI, SA, UKR), responding to queries from people with MHCs and their caregivers (GE, SL), and delivery of psychological therapies (CH, GE, SA).

Low awareness of the availability of telephone-based psychological services limited their use in some settings (UKR), while the digital divide prevented widespread use of digital platforms for psychological interventions in CH, ET, SA and NI.

*‘... we have come across [low awareness of remote psychological services] in some important way, not only with the digital illiteracy of our [service] users but also with our own digital illiteracy, using our own equipment and that this [situation] has meant a significant gap and access to technologies ... It [the situation] has to do with the geography, with the countryside [and] with the connectivity of some areas...’*

*Health Service Professional, Chile*

No resources were allocated to the transition to phone/internet-based care, with costs falling to providers and adverse consequences for quality (CH). Poor training and familiarity with this mode of consultation by health workers was an additional barrier (NI). Barriers to access were seen for elderly, rural communities, and very poor families, fuelling concerns that those most in need were least likely to be able to access digital mental health care (CH, GE, SA). This led to early resumption of face-to-face consultations for high-risk cases (CH). Privacy and confidentiality in remote care were concerns (CH, SA), especially for children and adolescents.

*‘It’s just that people don’t always have phones, you can’t always get hold of them. And also, people don’t always have access to private spaces to speak to the mental health nurses in their homes. So, it just became difficult; the technology did not help hugely.’*

*Psychiatrist, South Africa*

## Physical and mental health

COVID-19 exposed systemic difficulties in the provision of health care for people with MHCs across six countries, apart from SA, in the various healthcare sectors (primary, secondary, social care or NGOs). During the pandemic there was limited, inconsistent or worsened access and delivery of physical health care, with inadequate preparation for the COVID-19 pandemic in already under-resourced services. People with mental health conditions or developmental

disabilities overall seemed to experience direct or indirect discrimination from healthcare workers, e.g. stigmatising attitudes, fear of unpredictable or aggressive behaviour from health care workers in most countries (CH, ET, GE, NI, SL).

Information on COVID-19 and access to protective interventions.

Although all countries provided information to the public about COVID-19, the information was either not easily accessible for many people with MHCs (ET) or was not tailored to their specific needs and concerns (CH, ET, GE, SA, SL). In some instances, information appeared to exacerbate mental ill-health and reduce uptake of protective measures because of frightening messaging (ET) or because of inaccurate and inconsistent information accessed via social media (CH, GE, UKR). In response to the need for clear information for people with MHCs and their caregivers, SL launched a country wide telephone line to address queries. Telephone services were provided from the outpatient clinic and mobile team members in GE who provided educational instructions to the patients.

In most countries, people with MHCs from more vulnerable populations (homeless, international migrants) had limited or no access to personal protection from COVID-19. Some countries reported that people with MHCs were less able to afford protective interventions (e.g., masks, sanitiser or gloves) due to economic disadvantages (ET, GE, NI,).

*‘Patients did not have soap and no disinfectant solution was available as it contains alcohol and the administration did not allow these liquids in the wards for fear that patients would drink it. No alternatives were used, such as alcohol wipes or soap. Patients did not wear a mask, even if the rules prohibited staying indoors without a mask’.*

*Service User, Georgia*

In Nigeria, COVID-19 testing was by demand and, therefore less testing was conducted amongst those with severe MHCs.

There was some evidence of a mismatch between national policies prioritising people with MHCs for vaccination (ET, GE), and its implementation in communities. In some countries, this was partly due to low levels of awareness amongst people with MHCs (CH), but also due to a lack of programmes actively seeking to offer vaccinations to people with MHCs (UKR).

#### COVID-19 care for people with mental health conditions

Several countries reported that people with MHCs faced discrimination in accessing COVID-19 care and/or that the care they received was inferior to those without MHCs. Examples were provided of individuals with symptomatic MHCs being excluded from ambulance services or COVID-19 facilities (SL, UKR,). People with symptomatic MHCs who had COVID-19 were admitted to mental health institutions for COVID-19 care in GE, SA and SL regardless of whether the person's mental state warranted in-patient psychiatric care. In Chile, people with MHCs were excluded from hotels for quarantining people with COVID-19. People with MHCs in COVID-19 facilities reportedly received less attention, lower standard of care and were stigmatised by healthcare workers (UKR, ET) due to fear and lack of knowledge about mental illnesses.

*'Rather often, when patients with mental disorders and COVID-19 were hospitalized for special Covid clinics, doctors called in a panic and asked to take away those patients, even if their state do not demand treatment in the psychiatric institution'.*

*Director of a Psychiatric Hospital, Ukraine*

*'If a psychiatric patient reacts negatively due to lack of oxygen in the emergency setting, health care providers thought the patient is psychotic. They associated all maladaptive behaviours of patients in the COVID-19 treatment with mental illness. These could be due to a lack of mental health knowledge and thus, stigmatizing attitudes. Thus, we have been doing some activities to increase the mental health knowledge of the healthcare workers.'*

*Director of a hospital, Ethiopia*

Intensive care unit beds were reportedly accessible to people with MHCs if needed in Chile and South Africa, but with concerns about unequal access in Georgia, Sri Lanka and Ukraine. In Ethiopia access to intensive care facilities was extremely constrained for the whole population, with no reports of differential access. People with MHCs in Chile who lived in supported housing had less access to COVID-19 vaccines, despite officially being prioritised.

#### Access to physical healthcare

Longstanding discrimination pre-pandemic impeded receipt of care for non-COVID-19 physical health conditions in people with MHCs in Ethiopia, Nigeria and Ukraine, and to a lesser extent Sri Lanka. In all countries, the pandemic further disrupted access to physical healthcare, with no specific support extended to people with MHCs, and barriers encountered in some countries; for example, lacking social support to attend (UKR), unaffordability of transport and care (ET, NI, UKR), exclusion from in-patient physical health care if mental health symptoms were apparent (GE), and fewer and shorter contacts with mental health professionals (ET, NI, SA) reducing opportunities to detect co-morbid illness.

*We had a team of both physical and mental health care workers in the psychiatric ward before COVID-19. But during the pandemic, all medical professionals went for COVID-19 response. They were getting additional incentives, risk payment when they work at the COVID-19 response. No one was delivering the care for the comorbid physical conditions of our psychiatric patients. Only one medical professional remained to deliver the physical health care.*

*Psychiatrist, Ethiopia*

People who were homeless, or who had alcohol or substance use disorders were excluded from physical health care in Chile.

#### COVID-19 protection and care within mental health and social services

Protections for people with MHCs and staff on in-patient wards were reportedly inadequate, due to lack of access to disinfectant (GE), protective personal equipment (ET, NI, UKR), or with

respect to mask wearing (GE, SA). In some countries (ET, GE, SA, SL), in-patient facilities reported challenges with safely separating patients who were COVID-19 positive from other in-patients. Human rights violations were reported, with patients who tested positive apparently isolated with minimal social contact in ET and admission of COVID-positive patients to psychiatric wards (SA). It was difficult for families to obtain information about in-patients (CH). COVID-19 care for in-patients who tested positive was said to be poor in some countries (CH, ET), others opened dedicated wards (UKR, SL) and introduced rigorous quarantine procedures for newly admitted patients (SL). In residential social care settings in Ethiopia and Georgia, lack of COVID-19 testing or procedures to isolate those with suspected COVID-19 were apparent.

### Innovations and strengthening system resilience.

Examples of innovation and measures that strengthened health system resilience in response to the pandemic were evident in all countries. Key measures are summarised in Fig 3 in relation to: strengthening community supports; maintaining access to mental health care; quality of mental health care; and co-ordination of care.

### **Fig 3. Innovations and strengthening system resilience in response to the pandemic**

## Discussion

In the MASC study, using comparable methods across seven countries, we were able to triangulate data from multiple sources and, in several countries, combine with national expert consensus to obtain the most complete picture of impacts of the COVID-19 pandemic on mental health services and service users in LMICs to date. There are several key implications of our findings for increasing preparedness and health system resilience for future disasters.

First, the pernicious effect of mental illness-related stigma was identified in all the study sites and contributed towards the especially low status given by policy makers and health service leaders

towards mental health care during the first phase of the pandemic. This is consistent with the findings of the early WHO rapid appraisal of the impact of COVID-19 on mental health care [6] and is also fully in line with the main findings of the Lancet Commission on Ending Stigma and Discrimination in Mental Health [10]. This tendency to provide low rates of funding for mental health care in routine practice, and lower rates still during times of crisis is identified in the Lancet Commission report as ‘structural stigma.’ The consequences of interruptions to mental health services and the stripping away of vital psychosocial support were felt acutely by people with MHCs and their families. Despite WHO calls for mental health care to be designated an essential service to be maintained during the pandemic, this was manifestly not the case on the ground in many countries, particularly for the low-income countries represented in MASC.

Addressing structural stigma requires co-ordinated advocacy from coalitions of stakeholders, but most critically must involve people with lived experience of MHCs and their families and informal caregivers [38]. However, mental health service users are often marginalised, disempowered and may not have strong collective voices where the need is greatest [39]. Research-based efforts have shown that it is possible to equip and empower people with lived experience of MHCs to mobilise, advocate and participate in evidence-based social contact interventions aimed at reducing stigma and increasing commitment of planners and providers to mental health care [40]. However, accountability of governments, resources for nascent service user associations and political investments are needed to make involvement meaningful and sustained.

Second, despite pre-existing vulnerabilities of people with MHCs to poorer physical health and excess mortality compared to the general population [11], and increased risk of contracting COVID-19, and experiencing greater severity of infection and increased COVID-related mortality [41], people with MHCs faced more barriers to accessing COVID-19 prevention and treatment programmes than the general population. The physical segregation of mental health care from

general health care services, reported in most of the countries participating in MASC, contributed to this injustice, but again stigma and the low priority given to the specific needs of people with MHCs exacerbated exclusion. Our findings accord with reports from diverse global settings that people with severe MHCs were not being given sufficient priority for vaccination against COVID-19 [26].

In MASC, the notable exception was Sri Lanka which had succeeded in ‘building back better’ following the 2005 Tsunami and prioritised the integration of mental health care into primary healthcare services. This integrative approach, advocated by the World Health Organization in the mental health Gap Action Programme (mhGAP) [42] has many immediate benefits for health systems and populations, including direct strengthening of the health system through horizontal rather than vertical programming, increasing access to mental health care through local availability, reducing exposure to institution-based human rights abuses, improving physical health care of people with severe MHCs [43] and can contribute to making universal health coverage a reality for one of the most underserved groups [44]. However, beyond immediate effects, integration also increases health system resilience in the face of humanitarian disasters. In Ukraine, the pandemic response was quick to pivot towards strengthening delivery of mental health care within primary health care, but other countries did not have the capacity to adapt once the pandemic hit. Indeed, in Ethiopia, funds were diverted away from efforts to scale-up mental health within primary healthcare settings [32]. This underlines the importance of system preparedness and the need for renewed commitment to decentralised, integrated, community-based mental health services globally [45].

Third, to varying extents, all sites showed accelerated implementation of digital and remote consulting (See Figure 1), but this also brought the risks of exacerbating inequities – the so-called ‘digital divide’ for access to mental health care [46]. In preparing for future disasters, account



needs to be taken of the fact that older people, those with lower levels of education, people with low socio-economic status, rural residents and those with severe MHCs are least likely to be able to benefit from digital ‘solutions’ to accessing mental health care. Providers also need to be equipped with the necessary skills and resources. Nonetheless, digital technologies may have a role to play in improving disaster response. A conspicuous lack of good quality data on service utilisation was evidenced in all MASC data. Information systems for mental health care are not fit for purpose but present an enormous opportunity to improve system responsiveness. With robust safeguards to protect confidentiality, joined up electronic medical record systems and electronic databases of caseloads could be employed to identify people with MHCs who need to be prioritised for pro-active outreach care, home-based delivery of medicines, welfare support and tailored prevention messages. At present, research into digital technologies to improve mental health service planning and improvement in LMICs has been sorely neglected [47].

Limitations of our study include the lack of comparable quantitative utilisation data across countries, concerns about the accuracy of routine data, and reliance on national level experts who may not have represented the situation fully. However, through our snowballing approach to consult more widely and integration of research and grey literature reports we sought to obtain a comprehensive perspective on COVID-19 impacts.

## **Conclusions**

All the countries included in this study showed low levels of preparedness for the impacts a pandemic would have on mental health services. Indeed, in most countries, existing systems of mental health care do not allow for adequate mental health care at any time, but especially exposed during a pandemic. Immediate and sustained investment is needed to expand access to mental health care through integration into primary care and community platforms, while also

addressing structural stigma and technology gaps that could improve mental health care quality and system resilience.

**Supplementary File 1:** Topic guide for semi-structured interviews and focus group discussions

**Supplementary File 2:** MASC rating tool

**Supplementary File 3:** MASC Narrative data synthesis tool

**Supplementary File 4:** Excel with service utilization data

**Supplementary File 5:** COREQ checklist

### **Funding**

No direct funding was received for the MASC study.

## Acknowledgements

Team activities in Chile received support from the Research Fund of the School of Public Health, University of Chile. In Ethiopia, MASC researchers were supported by the National Institute for Health and Social Care Research (NIHR) Global Health Research Unit on Health System Strengthening in Sub-Saharan Africa, King's College London (GHRU 16/136/54) using UK aid from the UK Government to support global health research. The views expressed in this publication are those of the authors and not necessarily those of the NIHR or the Department of Health and Social Care or Public Health England. CH, AA, AM and WF were supported by the AMARI project (African Mental Health Research Initiative) as part of the DELTAS (Developing Excellence in Leadership, Training and Science) Africa Initiative [DEL-15-01]. In Ukraine, semi-structured focus groups with key informants, including mental health services providers, planners, decision-makers, and service users and members of relevant organisations were conducted within the Think Tank Development Initiative for Ukraine (project N°SG53708), implemented by the International Renaissance Foundation in partnership with the Open Society Initiative for Europe (OSIFE) with the financial support of the Embassy of Sweden in Ukraine.

GT is supported by the National Institute for Health and Care Research (NIHR) Applied Research Collaboration South London (NIHR ARC South London) at King's College Hospital NHS Foundation Trust; CH, GT and AA receive support from NIHR through the NIHR Global Health Research Group on Homelessness and Mental Health in Africa (NIHR134325) and CH also receives support from the SPARK project (NIHR200842), using UK aid from the UK Government. The views expressed are those of the authors and not necessarily those of the NIHR or the Department of Health and Social Care. GT is also supported by the UK Medical Research Council (UKRI) for the Indigo Partnership (MR/R023697/1) awards. CH, AA and WF receive support from the Wellcome Trust through grants 222154/Z20/Z. CH also receives support from WT grant 223615/Z/21/Z. HL is supported by the MRC-

UKRI in relation to the Indigo Partnership (MR/R023697/1) and Adolescents' Resilience and Treatment Needs for Mental health in Indian Slums (ARTEMIS) Grant no: MR/S023224/1 awards. OG receives support from the UK Medical Research Council (UKRI) through the International Research Programme on Psychoses in Diverse Settings (INTREPID III) award (MR/X022242/1). In Ukraine, the study was supported by the administration of Taras Shevchenko National University of Kyiv and research team of the Interdisciplinary analytical centre on socioeconomic well-being and mental health. We would like to thank the heads of the facilities, mental health services providers and service users that agreed to participate in our study and for those people who supported data collection.

For the purpose of open access, the authors have applied a Creative Commons Attribution (CC BY) licence to any Author Accepted Author Manuscript version arising from this submission.

## References

1. World Health Organisation. World Mental Health Report. Geneva: WHO; 2022.
2. Thornicroft G, Chatterji S, Evans-Lacko S, Gruber M, Sampson N, Aguilar-Gaxiola S, et al. Undertreatment of people with major depressive disorder in 21 countries. *The British journal of psychiatry : the journal of mental science*. 2017;210(2):119-24. Epub 2016/12/03. doi: 10.1192/bjp.bp.116.188078. PubMed PMID: 27908899; PubMed Central PMCID: PMC5288082
3. Vigo D, Patten S, Pajer K, Krausz M, Taylor S, Rush B, et al. Mental Health of Communities during the COVID-19 Pandemic. *Can J Psychiatry*. 2020;65(10):681-7. Epub 2020/05/12. doi: 10.1177/0706743720926676. PubMed PMID: 32391720; PubMed Central PMCID: PMC7502878.
4. Wu T, Jia X, Shi H, Niu J, Yin X, Xie J, et al. Prevalence of mental health problems during the COVID-19 pandemic: A systematic review and meta-analysis. *J Affect Disord*. 2021;281:91-8. Epub 2020/12/15. doi: 10.1016/j.jad.2020.11.117. PubMed PMID: 33310451; PubMed Central PMCID: PMC7710473.
5. Wang Q, Xu R, Volkow ND. Increased risk of COVID-19 infection and mortality in people with mental disorders: analysis from electronic health records in the United States. *World Psychiatry*. 2020. Epub 2020/10/08. doi: 10.1002/wps.20806. PubMed PMID: 33026219.
6. World Health Organization. The Impact of COVID-19 on mental, neurological and substance use services: results of a rapid assessment. Geneva: World Health Organization; 2020.
7. United Nations. The 2030 Agenda for Global Action and the Sustainable Development Goals. NY: 2015.

8. Hanlon C, Fekadu A, Jordans M, Kigozi F, Petersen I, Shidhaye R, et al. District mental healthcare plans for five low- and middle-income countries: commonalities, variations and evidence gaps. *Br J Psychiatry*. 2016;208 Suppl 56:s47-54. Epub 2015/10/09. doi: 10.1192/bjp.bp.114.153767. PubMed PMID: 26447169; PubMed Central PMCID: PMC4698556.
9. Wang PS, Aguilar-Gaxiola S, Alonso J, Angermeyer MC, Borges G, Bromet EJ, et al. Use of mental health services for anxiety, mood, and substance disorders in 17 countries in the WHO world mental health surveys. *Lancet*. 2007;370(9590):841-50.
10. Thornicroft G, Sunkel C, Alikhon Aliev A, Baker S, Brohan E, El Chammay R, et al. The Lancet Commission on ending stigma and discrimination in mental health. *Lancet*. 2022;400(10361):1438-80. Epub 20221009. doi: 10.1016/s0140-6736(22)01470-2. PubMed PMID: 36223799.
11. Fekadu A, Medhin G, Kebede D, Alem A, Cleare AJ, Prince M, et al. Excess mortality in severe mental illness: 10-year population-based cohort study in rural Ethiopia. *Br J Psychiatry*. 2015;206(4):289-96. Epub 20150205. doi: 10.1192/bjp.bp.114.149112. PubMed PMID: 25657358.
12. Liu NH, Daumit GL, Dua T, Aquila R, Charlson F, Cuijpers P, et al. Excess mortality in persons with severe mental disorders: a multilevel intervention framework and priorities for clinical practice, policy and research agendas. *World Psychiatry*. 2017;16(1):30-40. Epub 2017/01/28. doi: 10.1002/wps.20384. PubMed PMID: 28127922; PubMed Central PMCID: PMC469481.
13. Saxena S, Thornicroft G, Knapp M, Whiteford H. Resources for mental health: scarcity, inequity, and inefficiency. *Lancet*. 2007;370(9590):878-89. Epub 2007/09/07. doi: 10.1016/S0140-6736(07)61239-2. PubMed PMID: 17804062.

14. Whiteford HA, Ferrari AJ, Degenhardt L, Feigin V, Vos T. The global burden of mental, neurological and substance use disorders: an analysis from the global burden of disease study 2010. *PLoS one*. 2015;10(2):e0116820. doi: 10.1371/journal.pone.0116820. PubMed PMID: 25658103; PubMed Central PMCID: PMC4320057.
15. Patel V, Fancourt D, Furukawa TA, Kola L. Reimagining the journey to recovery: The COVID-19 pandemic and global mental health. *PLOS Medicine*. 2023;20(4):e1004224. doi: 10.1371/journal.pmed.1004224.
16. Nose M, Gastaldon C, Acarturk C, Purgato M, Ostuzzi G, Barbu C. Have the COVID-19 outbreak and related restrictions affected the right to mental health of people with severe mental health conditions? *Int Rev Psychiatry*. 2023;35(2):180-93. Epub 2023/04/28. doi: 10.1080/09540261.2022.2145183. PubMed PMID: 37105147.
17. Aminoff SR, Mork E, Barrett EA, Simonsen C, Ten Velden Hegelstad W, Lagerberg TV, et al. Locked out during COVID-19 lockdown-an online survey of relatives of people with psychotic and bipolar disorders in Norway. *BMC Public Health*. 2022;22(1):294. Epub 2022/02/14. doi: 10.1186/s12889-022-12625-y. PubMed PMID: 35151293; PubMed Central PMCID: PMC8841121.
18. Balestrieri M, Rucci P, Amendola D, Bonizzoni M, Cerveri G, Colli C, et al. Emergency Psychiatric Consultations During and After the COVID-19 Lockdown in Italy. A Multicentre Study. *Front Psychiatry*. 2021;12:697058. Epub 2021/07/03. doi: 10.3389/fpsy.2021.697058. PubMed PMID: 34211413; PubMed Central PMCID: PMC8239213.
19. Montes JM, Hernandez-Huerta D. Impact of the COVID-19 pandemic on acute inpatient psychiatric units in Spain. *Psychiatry Res*. 2021;304:114136. Epub 2021/08/01. doi:

10.1016/j.psychres.2021.114136. PubMed PMID: 34332433; PubMed Central PMCID:

PMCPMC8310392.

20. Benjenk I, Saliba Z, Duggal N, Albaroudi A, Posada J, Chen J. Impact of COVID-19 Mitigation Efforts on Adults With Serious Mental Illness: A Patient-Centered Perspective. *J Nerv Ment Dis.* 2021;209(12):892-8. Epub 2021/12/01. doi: 10.1097/NMD.0000000000001389. PubMed PMID: 34846356; PubMed Central PMCID: PMCPMC8614196.

21. Rozental A, Sorman K, Ojala O, Jangard S, El Alaoui S, Mansson KNT, et al. Mental health in individuals with self-reported psychiatric symptoms during the COVID-19 pandemic: Baseline data from a swedish longitudinal cohort study. *Front Psychiatry.* 2022;13:933858. Epub 2022/08/06. doi: 10.3389/fpsy.2022.933858. PubMed PMID: 35928773; PubMed Central PMCID: PMCPMC9343700.

22. Dalkner N, Ratzenhofer M, Fleischmann E, Fellendorf FT, Bengesser S, Birner A, et al. Psychological and behavioral response on the COVID-19 pandemic in individuals with bipolar disorder: A multicenter study. *Psychiatry Res.* 2022;310:114451. Epub 2022/02/23. doi: 10.1016/j.psychres.2022.114451. PubMed PMID: 35190338; PubMed Central PMCID: PMCPMC8847084.

23. Hassan L, Peek N, Lovell K, Carvalho AF, Solmi M, Stubbs B, et al. Disparities in COVID-19 infection, hospitalisation and death in people with schizophrenia, bipolar disorder, and major depressive disorder: a cohort study of the UK Biobank. *Mol Psychiatry.* 2022;27(2):1248-55. Epub 2021/12/08. doi: 10.1038/s41380-021-01344-2. PubMed PMID: 34873324; PubMed Central PMCID: PMCPMC9054655.



24. Nemani K, Li C, Olfson M, Blessing EM, Razavian N, Chen J, et al. Association of Psychiatric Disorders With Mortality Among Patients With COVID-19. *JAMA Psychiatry*. 2021;78(4):380-6. doi: 10.1001/jamapsychiatry.2020.4442. PubMed PMID: 33502436; PubMed Central PMCID: PMC7841576.
25. Mascayano F, Bruni A, Susser E. Implications of Global and Local Inequalities in COVID-19 Vaccine Distribution for People With Severe Mental Disorders in Latin America. *JAMA Psychiatry*. 2021;78(9):945-6. doi: 10.1001/jamapsychiatry.2021.1416.
26. Kumar S, Pathare S, Esponda GM. COVID-19 vaccine prioritisation for individuals with psychoses. *Lancet Psychiatry*. 2021;8(9):751. Epub 20210618. doi: 10.1016/s2215-0366(21)00236-4. PubMed PMID: 34147156; PubMed Central PMCID: PMC8376235.
27. Ariawan Y, Dewi C, Manuaba RW, Manuaba C, Huda MK. The Legal Responsibility to the Family for Shackling People with Mental Illness During the Covid-19 Pandemic. *Indian J Forensic Med Toxicology*. 2022;16:440-6. doi: doi:10.37506/ijfmt.v16i2.18022.
28. Tang L, Gao Y, Qi S, Cui J, Zhou L, Feng Y. Prevalence of post-traumatic stress disorder symptoms among patients with mental disorder during the COVID-19 pandemic. *BMC Psychiatry*. 2022;22(1):156. Epub 2022/03/03. doi: 10.1186/s12888-022-03790-w. PubMed PMID: 35232421; PubMed Central PMCID: PMC8886345.
29. Gupta T, Swami MK, Choudhary S, Khivsara A, Suthar N, Nebhinani N, et al. Psychological Impact of the COVID-19 Pandemic and Associated Lockdown on Outpatients With Psychiatric Illness: A Cross-Sectional Study. *Prim Care Companion CNS Disord*. 2022;24(5). Epub 2022/09/21. doi: 10.4088/PCC.22m03311. PubMed PMID: 36126919.

30. Kola L, Kohrt BA, Hanlon C, Naslund JA, Sikander S, Balaji M, et al. COVID-19 mental health impact and responses in low-income and middle-income countries: reimagining global mental health. *Lancet Psychiatry*. 2021;8(6):535-50. Epub 20210224. doi: 10.1016/s2215-0366(21)00025-0. PubMed PMID: 33639109; PubMed Central PMCID: PMC9764935.
31. Toro-Devia O, Solis-Araya C, Soto-Brandt G, Sepúlveda-Queipul C, Pino P, Loyola F, et al. Adverse sequelae of the COVID -19 pandemic on mental health services in Chile. *Rev Panam Salud Publica*. 2023;47:e87. Epub 20230612. doi: 10.26633/rpsp.2023.87. PubMed PMID: 37324198; PubMed Central PMCID: PMC9764935.
32. Mihretu A, Fekadu W, Alemu AA, Amare B, Assefa D, Misganaw E, et al. Impact of the COVID-19 pandemic on mental health care and people with mental health conditions in Ethiopia: the MASC mixed-methods study. *Int J Ment Health Syst*. 2023;17(1):47. Epub 20231206. doi: 10.1186/s13033-023-00612-8. PubMed PMID: 38057791; PubMed Central PMCID: PMC9764935.
33. Davies T, Daniels I, Roelefse M, Dean C, Parker J, Hanlon C, et al. Impacts of Covid-19 on mental health service provision in the Western Cape, South Africa: the MASC study. *PloS one*. 2023;18(8):e0290712.
34. Pishel V, Polyvianaia M, Pinchuk I, Myshakivska O, Thornicroft G, Hanlon C. Mental Health of Healthcare Workers during COVID-19 Pandemic in Ukraine. *Proc Shevchenko Sci Soc Med Sci*. 2022;66(1).
35. Brooks J, McCluskey S, Turley E, King N. The Utility of Template Analysis in Qualitative Psychology Research. *Qual Res Psychol*. 2015;12(2):202-22. Epub 2015/04/03. doi: 10.1080/14780894.2015.1055714.

10.1080/14780887.2014.955224. PubMed PMID: 27499705; PubMed Central PMCID: PMCPMC4960514.

36. King N. Doing template analysis. In: Symon G, Cassell C, editors. Qualitative Organizational Research: Core Methods and Current Challenges. London: SAGE Publications; 2012.

37. O'Cathain A, Murphy E, Nicholl J. Three techniques for integrating data in mixed methods studies. *BMJ*. 2010;341:c4587. Epub 2010/09/21. doi: 10.1136/bmj.c4587. PubMed PMID: 20851841.

38. Clay J, Eaton J, Gronholm PC, Semrau M, Votruba N. Core components of mental health stigma reduction interventions in low- and middle-income countries: a systematic review. *Epidemiol Psychiatr Sci*. 2020;29:e164. Epub 2020/09/05. doi: 10.1017/S2045796020000797. PubMed PMID: 32883399; PubMed Central PMCID: PMCPMC7503169.

39. Lempp H, Abayneh S, Gurung D, Kola L, Abdulmalik J, Evans-Lacko S, et al. Service user and caregiver involvement in mental health system strengthening in low-and middle-income countries: a cross-country qualitative study. *Epidemiology and psychiatric sciences*. 2018;27(1):29-39.

40. Kohrt BA, Jordans MJD, Turner EL, Rai S, Gurung D, Dhakal M, et al. Collaboration With People With Lived Experience of Mental Illness to Reduce Stigma and Improve Primary Care Services: A Pilot Cluster Randomized Clinical Trial. *JAMA Network Open*. 2021;4(11):e2131475. PubMed PMID: 34730821.

41. Liu L, Ni SY, Yan W, Lu QD, Zhao YM, Xu YY, et al. Mental and neurological disorders and risk of COVID-19 susceptibility, illness severity and mortality: A systematic review, meta-analysis

and call for action. *EClinicalMedicine*. 2021;40:101111. Epub 20210908. doi:

10.1016/j.eclinm.2021.101111. PubMed PMID: 34514362; PubMed Central PMCID: PMC8424080.

42. Keynejad R, Spagnolo J, Thornicroft G. WHO mental health gap action programme (mhGAP) intervention guide: updated systematic review on evidence and impact. *Evid Based Ment Health*. 2021;24(3):124-30. Epub 20210426. doi: 10.1136/ebmental-2021-300254. PubMed PMID: 33903119; PubMed Central PMCID: PMC8311089.

43. Hanlon C, Medhin G, Dewey ME, Prince M, Assefa E, Shibre T, et al. Efficacy and cost-effectiveness of task-shared care for people with severe mental disorders in Ethiopia (TaSCS): a single-blind, randomised, controlled, phase 3 non-inferiority trial. *Lancet Psychiatry*. 2022;9(1):59-71. doi: 10.1016/s2215-0366(21)00384-9. PubMed PMID: 34921796; PubMed Central PMCID: PMC8872807.

44. Stewart HLN, Jackman M, Agarwal S, Abanga MA, Kyalo C, Mkorongo A, et al. Perspectives of lived experience across continents: our reality and call for universal health coverage. *Lancet Psychiatry*. 2021;8(1):6-8. doi: 10.1016/s2215-0366(20)30526-5. PubMed PMID: 33341171.

45. World Health Organization. *World mental health report: transforming mental health for all*. Geneva: WHO, 2022.

46. Kola L, Kohrt BA, Acharya B, Mutamba BB, Kieling C, Kumar M, et al. The path to global equity in mental health care in the context of COVID-19. *Lancet*. 2021;398(10312):1670-2. Epub 20211007. doi: 10.1016/s0140-6736(21)02233-9. PubMed PMID: 34627492; PubMed Central PMCID: PMC89754946.

47. Carter H, Araya R, Anjur K, Deng D, Naslund JA. The emergence of digital mental health in low-income and middle-income countries: A review of recent advances and implications for the treatment and prevention of mental disorders. *J Psychiatr Res.* 2021;133:223-46. Epub 2020/12/29. doi: 10.1016/j.jpsychires.2020.12.016. PubMed PMID: 33360867; PubMed Central PMCID: PMCPMC8801979.

Ethiopia - inpatient admissions<sup>a</sup>

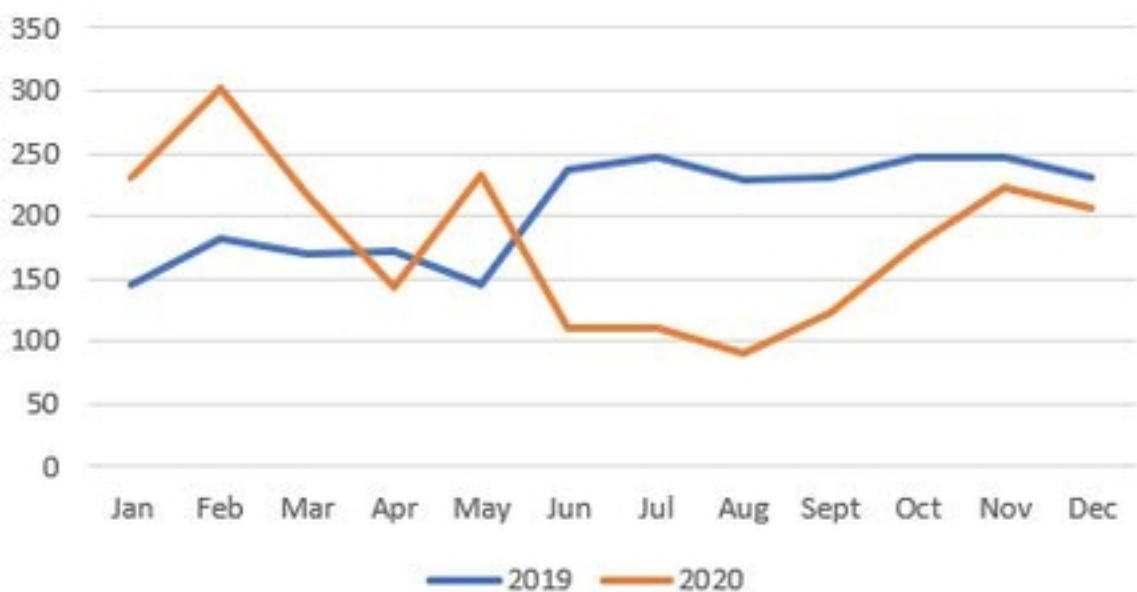

South Africa - inpatient admissions<sup>b</sup>

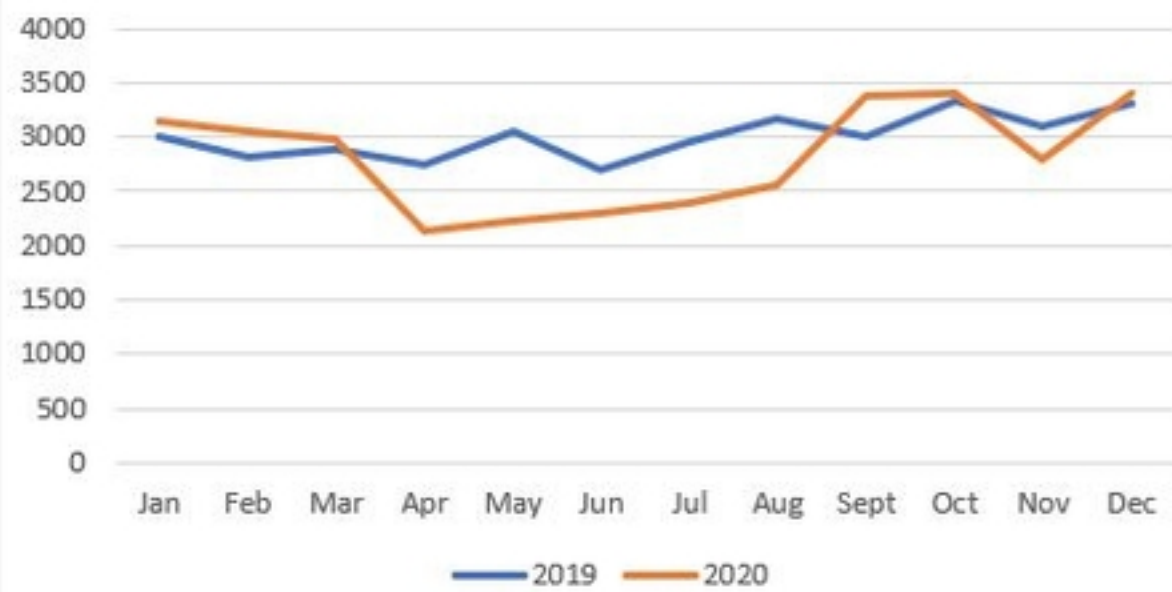

Sri Lanka - inpatient admissions<sup>c</sup>

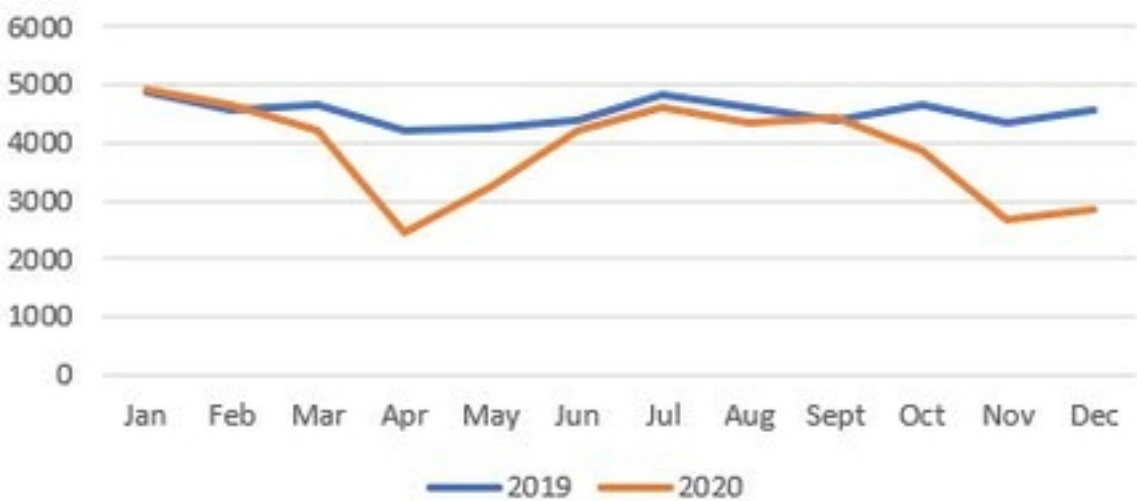

Ukraine - inpatient admissions<sup>d</sup>

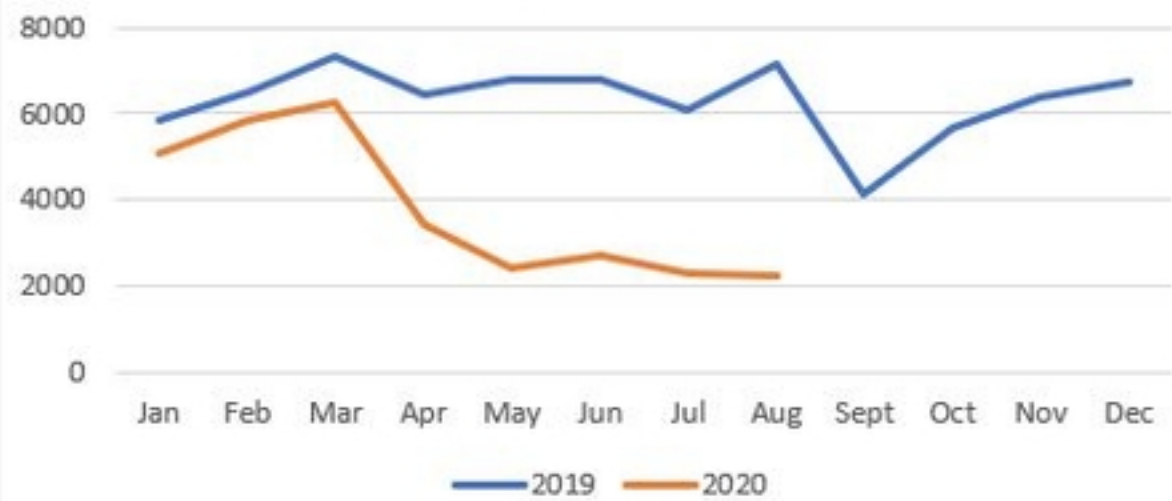

Figure

Chile - outpatient contacts<sup>i</sup>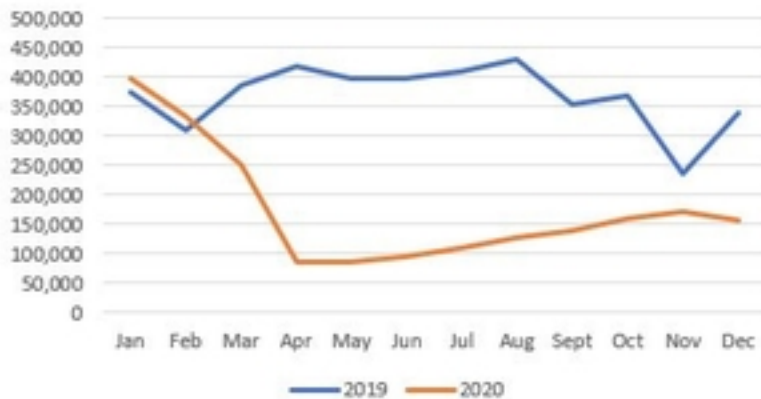Ethiopia - outpatient contacts<sup>ii</sup>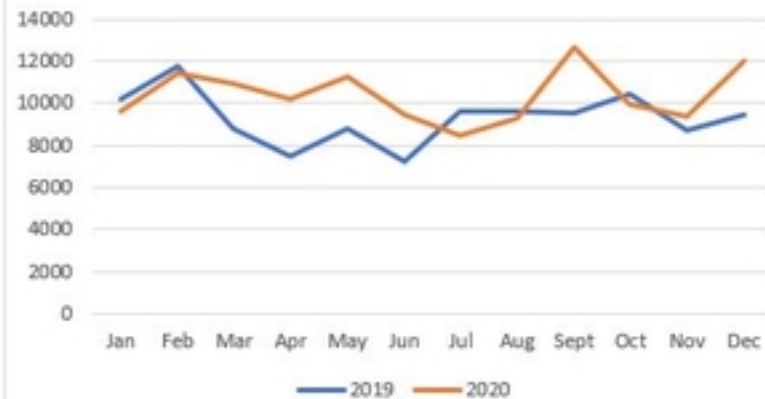Georgia - outpatient contacts<sup>iii</sup>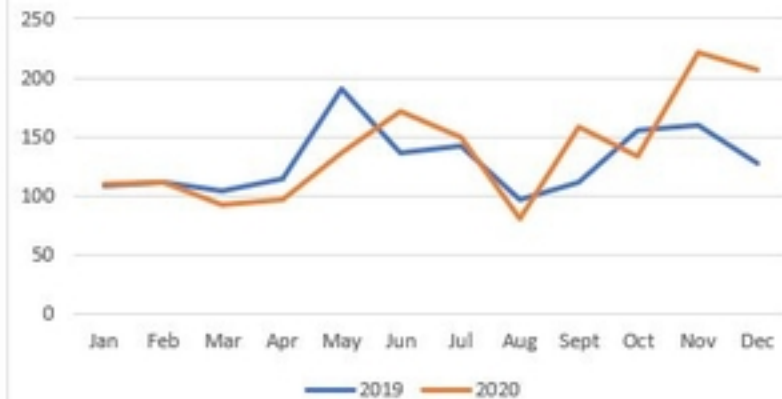South Africa - outpatient contacts<sup>iv</sup>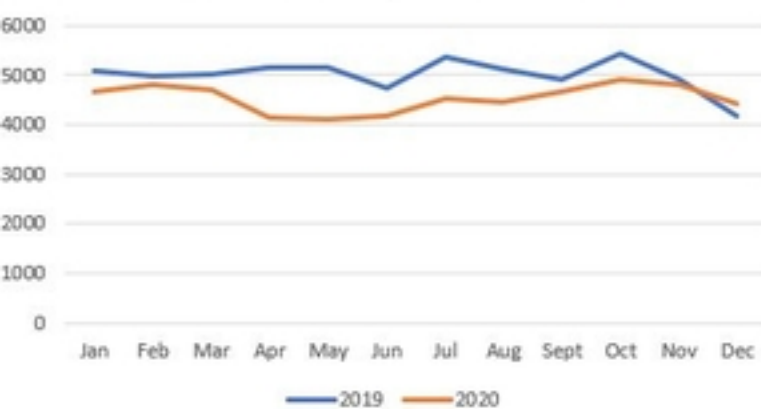Sri Lanka - outpatient contacts<sup>v</sup>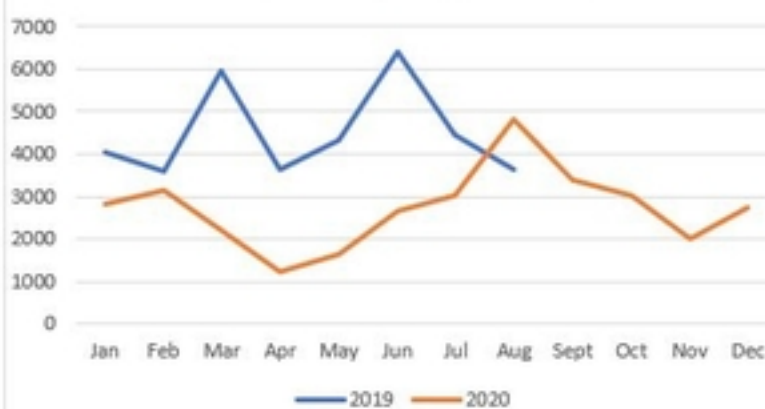Ukraine - outpatient contacts<sup>vi</sup>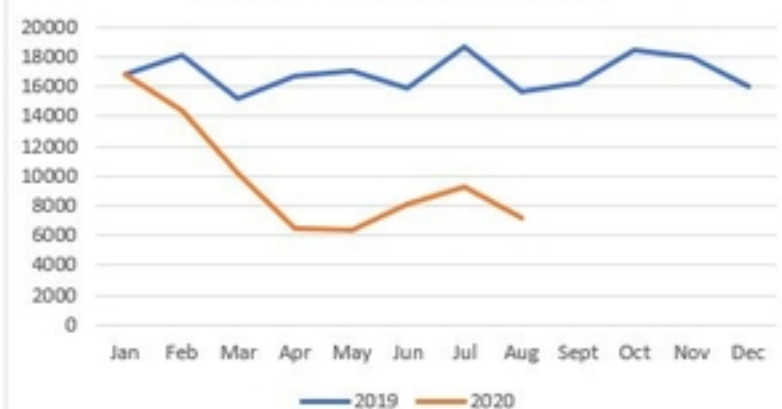

Figure

## **Strengthening community supports**

- Digital approaches to social contact and support for people with mental health conditions and caregivers

## **Maintaining access to mental health care**

- Political commitment to prioritising mental health as an essential service
- Prioritisation and expansion of mental health care in primary and general care settings
- Local availability, flexible dispensing and home

medRxiv preprint doi: <https://doi.org/10.1101/2024.06.18.24309132>; this version posted June 20, 2024. The copyright holder for this preprint (which was not certified by peer review) is the author/funder, who has granted medRxiv a license to display the preprint in perpetuity. It is made available under a [CC-BY 4.0 International license](#).

## **delivery of medication**

- Teleconsultations in better resourced settings
- Telephone contact to support engagement in care
- Community outreach/mobile mental health teams

## **Quality of mental health care**

- Telephone lines to provide information tailored to people with mental health conditions
- Phone-based responses to queries of people with mental health conditions
- Psychological therapies delivered using online platforms
- Linking together practitioners for online training and clinical mentorship

## **Co-ordination of care**

- Strengthening linkages between central and local services, facilitating back-referral, consultation and support
- Closer integration of mental health and physical health care
- Intersectoral co-ordination of care and delivery of care in non-clinical settings
